# Supplementary material
Source: PubMed Central journal article supplement (PMC7360515)
Supplement: Supp_Fig1.pdf [file Supp_Fig1.pdf]

## Supplementary Data

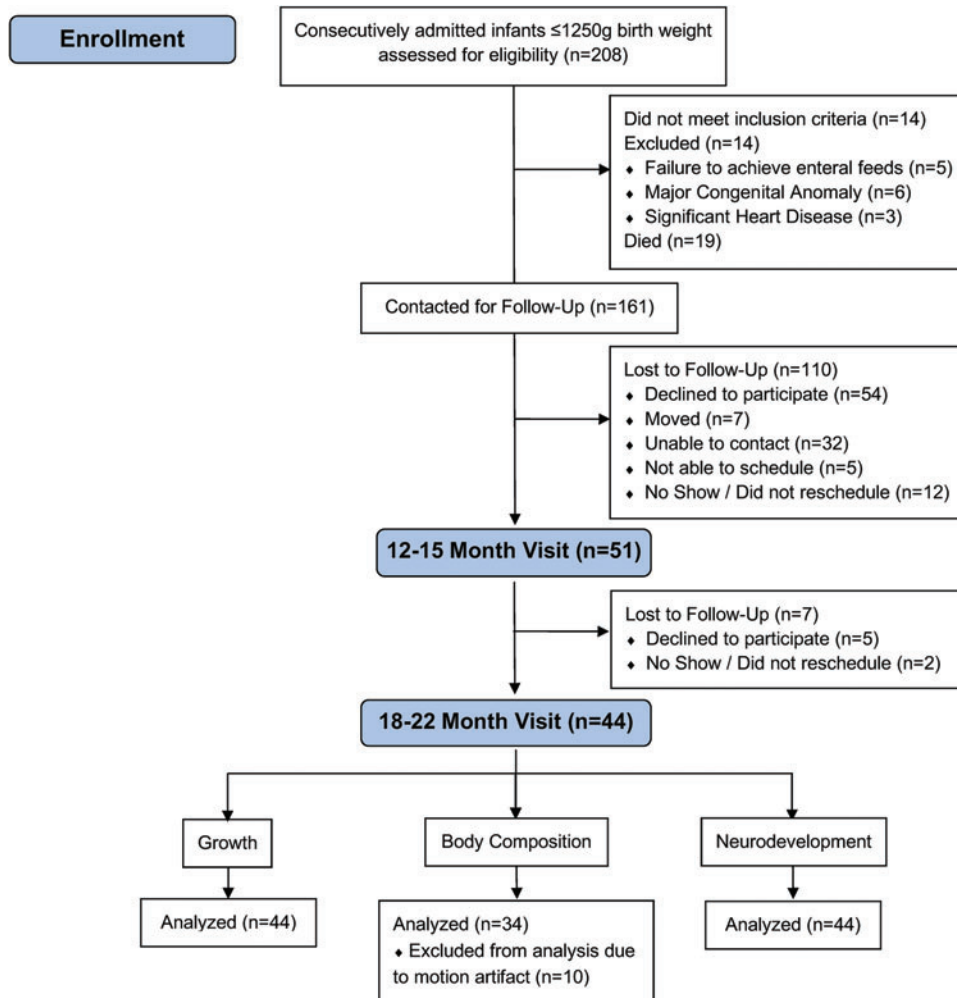

**SUPPLEMENTARY FIG. S1.** Flow diagram of subject recruitment, participation, and analysis from subject enrollment through the 18- to 22-month study visit.
