# Supplementary material
Source: PubMed Central journal article supplement (PMC7360515)
Supplement: Supp_Tables1-2.pdf [file Supp_Tables1-2.pdf]

SUPPLEMENTARY TABLE S1. COMPARISON OF BASELINE CHARACTERISTICS OF INFANTS SEEN AND NOT SEEN AT VISIT 1 (12–15 MONTHS CORRECTED AGE)

|                                                                  | <i>Subjects seen (n=51)</i> | <i>Subjects not seen (n=110)</i> | <i>p</i> |
|------------------------------------------------------------------|-----------------------------|----------------------------------|----------|
| Gestational age at birth (weeks) <sup>a</sup>                    | 27.8±2.6                    | 27.5±2.1                         | 0.440    |
| Male, <i>n</i> (%)                                               | 30 (59)                     | 57 (52)                          | 0.497    |
| Race, white/black/Hispanic/other, <i>n</i> <sup>b</sup>          | 15/18/14/4                  | 31/35/29/11                      | 0.417    |
| Birth                                                            |                             |                                  |          |
| Weight (g) <sup>a</sup>                                          | 893±204                     | 921±197                          | 0.404    |
| Length (cm) <sup>a</sup>                                         | 34.1±3.1                    | 34.6±2.7                         | 0.308    |
| HC (cm) <sup>a</sup>                                             | 24.2±2.0                    | 24.4±1.8                         | 0.657    |
| Discharge                                                        |                             |                                  |          |
| Weight (g) <sup>a</sup>                                          | 2,753±871                   | 2,946±1,076                      | 0.264    |
| Length (cm) <sup>a</sup>                                         | 46.1±3.9                    | 46.9±4.9                         | 0.329    |
| HC (cm) <sup>a</sup>                                             | 33.0±2.4                    | 33.5±3.0                         | 0.305    |
| Growth rate, birth to discharge                                  |                             |                                  |          |
| Weight (g/day) <sup>a</sup>                                      | 21.0±3.4                    | 22.0±3.6                         | 0.091    |
| Length (cm/week) <sup>a</sup>                                    | 0.96±0.21                   | 0.96±0.23                        | 0.892    |
| HC (cm/week) <sup>a</sup>                                        | 0.70±0.15                   | 0.72±0.15                        | 0.442    |
| Growth restriction (<10th percentile), <i>n</i> (%) <sup>c</sup> |                             |                                  |          |
| At birth                                                         | 13 (25)                     | 23 (21)                          | 0.547    |
| At discharge                                                     | 28 (55)                     | 50 (46)                          | 0.312    |
| Bronchopulmonary dysplasia, <i>n</i> (%)                         |                             |                                  |          |
| Moderate/severe                                                  | 19 (37)                     | 53 (48)                          | 0.234    |
| Intraventricular hemorrhage, <i>n</i> (%)                        |                             |                                  |          |
| Any                                                              | 9 (18)                      | 26 (24)                          | 0.421    |
| Grade 3/4                                                        | 1 (2)                       | 9 (8)                            | 0.172    |
| Late onset sepsis, <i>n</i> (%)                                  | 8 (16)                      | 10 (9)                           | 0.283    |
| NEC, <i>n</i> (%)                                                |                             |                                  |          |
| Medical                                                          | 0 (0)                       | 3 (3)                            | 0.552    |
| Surgical                                                         | 0 (0)                       | 2 (2)                            | 0.564    |
| Spontaneous intestinal perforation, <i>n</i> (%)                 | 1 (2)                       | 2 (2)                            | 1.000    |
| Calories at discharge [kcal/(kg·d)]                              | 122±12                      | 121±14                           | 0.656    |
| Receiving HM feeds at discharge, <i>n</i> (%)                    | 28 (55)                     | 39 (35)                          | 0.026    |
| PMA at discharge (weeks)                                         | 40.4±4.9                    | 40.7±7.4                         | 0.772    |
| Length of stay (days)                                            | 88±43                       | 93±56                            | 0.576    |

<sup>a</sup>Mean ± standard deviation.

<sup>b</sup>Data not available for four subjects.

<sup>c</sup>Based on Fenton 2013 growth curve.<sup>S1</sup>

HC, head circumference; HM, human milk; NEC, necrotizing enterocolitis; NICU, neonatal intensive care unit; PMA, postmenstrual age.

SUPPLEMENTARY TABLE S2. COMPARISON OF BASELINE CHARACTERISTICS OF INFANTS SEEN AND NOT SEEN AT VISIT 2 (18–22 MONTHS CORRECTED AGE)

|                                                           | Subjects seen (n=44) | Subjects not seen (n=117) | p     |
|-----------------------------------------------------------|----------------------|---------------------------|-------|
| Gestational age at birth (weeks) <sup>a</sup>             | 27.9±2.6             | 27.5±2.1                  | 0.308 |
| Male, n (%)                                               | 25 (57)              | 62 (53)                   | 0.724 |
| Race, white/black/Hispanic/other <sup>b</sup>             | 14/15/11/4           | 32/38/32/11               | 0.212 |
| Birth                                                     |                      |                           |       |
| Weight (g) <sup>a</sup>                                   | 891±206              | 921±197                   | 0.397 |
| Length (cm) <sup>a</sup>                                  | 34.1±3.1             | 34.5±2.8                  | 0.471 |
| HC (cm) <sup>a</sup>                                      | 24.1±2.0             | 24.4±1.8                  | 0.485 |
| Discharge                                                 |                      |                           |       |
| Weight (g) <sup>a</sup>                                   | 2,773±907            | 2,927±1,056               | 0.392 |
| Length (cm) <sup>a</sup>                                  | 46.3±3.9             | 46.8±4.8                  | 0.517 |
| HC (cm) <sup>a</sup>                                      | 33.0±2.5             | 33.4±2.9                  | 0.355 |
| Growth rate, birth to discharge                           |                      |                           |       |
| Weight (g/day) <sup>a</sup>                               | 21.1±3.5             | 21.9±3.5                  | 0.173 |
| Length (cm/week) <sup>a</sup>                             | 0.96±0.21            | 0.96±0.23                 | 0.968 |
| HC (cm/week) <sup>a</sup>                                 | 0.70±0.16            | 0.72±0.15                 | 0.446 |
| Growth restriction (<10th percentile), n (%) <sup>c</sup> |                      |                           |       |
| At birth                                                  | 12 (27)              | 24 (21)                   | 0.793 |
| At discharge                                              | 25 (57)              | 53 (46)                   | 0.221 |
| Bronchopulmonary dysplasia, n (%)                         |                      |                           |       |
| Moderate/severe                                           | 17 (39)              | 55 (47)                   | 0.378 |
| Intraventricular hemorrhage, n (%)                        |                      |                           |       |
| Any                                                       | 8 (18)               | 27 (23)                   | 0.532 |
| Grade 3/4                                                 | 1 (2)                | 9 (8)                     | 0.288 |
| Late onset sepsis, n (%)                                  | 8 (18)               | 10 (9)                    | 0.099 |
| NEC, n (%)                                                |                      |                           |       |
| Medical                                                   | 0 (0)                | 3 (3)                     | 0.563 |
| Surgical                                                  | 0 (0)                | 2 (2)                     | 0.600 |
| Spontaneous intestinal perforation, n (%)                 | 1 (2)                | 2 (2)                     | 1.000 |
| Calories at discharge [kcal/(kg·d)] <sup>a</sup>          | 122±12               | 121±14                    | 0.769 |
| Receiving HM feeds at discharge, n (%)                    | 25 (57)              | 42 (36)                   | 0.020 |
| PMA at discharge (weeks) <sup>a</sup>                     | 40.6±5.2             | 40.6±7.2                  | 0.992 |
| Length of stay (days) <sup>a</sup>                        | 89±45                | 92±55                     | 0.706 |

<sup>a</sup>Mean ± standard deviation.

<sup>b</sup>Data not available for four subjects.

<sup>c</sup>Based on the Fenton 2013 growth curve.<sup>S1</sup>

HC, head circumference; HM, human milk; NEC, necrotizing enterocolitis; NICU, neonatal intensive care unit; PMA, postmenstrual age.

### Supplementary Reference

- S1. Fenton TR, Kim JH. A systematic review and meta-analysis to revise the Fenton growth chart for preterm infants. *BMC Pediatr* 2013;13:59.
